# Supplementary material for: Supramolecular nanotubes with high thermal stability: a rigidity enhanced structure transformation induced by electron-beam irradiation and heat
Source: Royal Society of Chemistry journal article supplement (doi:10.1039/b618446d), 2007-01-01
Supplement: b618446d.pdf [file b618446d.pdf]

## Supplementary Information for

# Supramolecular Nanotubes with High Thermal Stability: A Rigidity Enhanced Structure Transformation Induced by Electron-Beam Irradiation and Heat

Kuo-Wei Huang, Jen-Hung Wang, Huai-Chung Chen, Hung-Chang Hsu, Yu-Cheng Chang, Ming-Yen Lu, Chung-Yang Lee and Lih-Juann Chen\*

Department of Materials Science and Engineering, National Tsing Hua University, Hsinchu, Taiwan, ROC.

E-mail: ljchen@mx.nthu.edu.tw

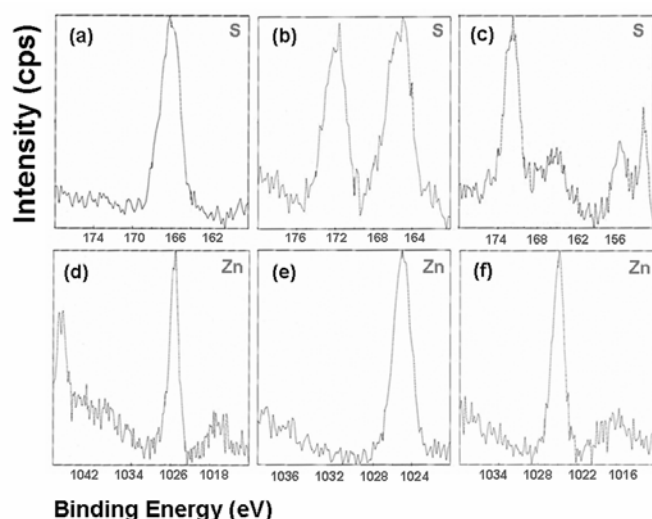

**Fig. S1** ESCA spectra acquired at specified binding energy (eV) for Zn and S of precursor zinc hexadecylxanthate (ZnHDX), half-reacted products (HRPs) and as-prepared nanotubes (NTs). (a), (b) and (c) correspond to the S binding-energy region of ZnHDX, HRP and NTs, respectively; (d), (e) and (f) represent Zn signal of ZnHDX, HRP and NTs, respectively.

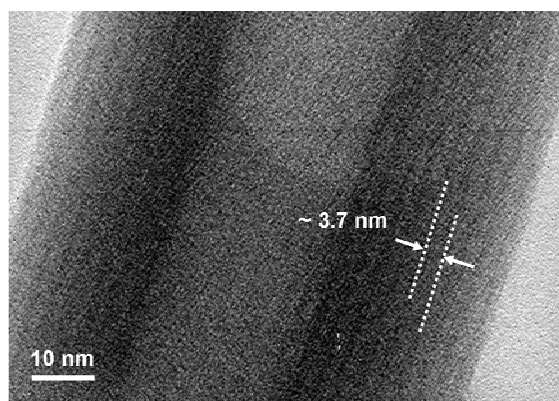

**Fig. S2** TEM image of pristine nanotube. The multi-wall structure in the wall region has been characterized to have layer spacing of  $\sim 3.7$  nm.

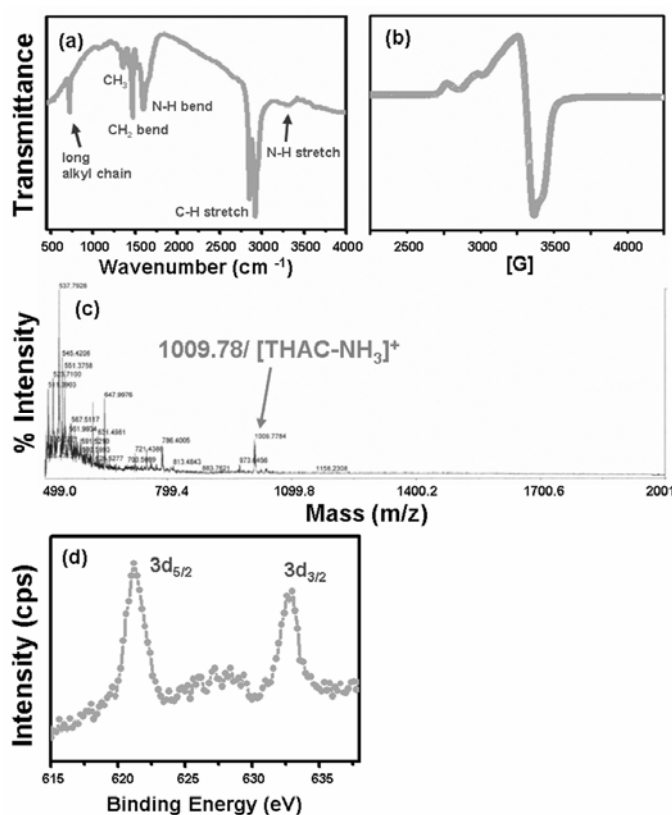

**Fig. S3** FTIR, ESR, and MALDI-TOF mass spectra of tetrahexadecylamine copper (II) (THAC)-dioxygen complex. (a) FTIR spectra of THAC complex recorded with KBr medium; (b) Regular axial (frozen, 77K) ESR result of powder form THAC complex; (c) Positive-ion MALDI-Mass spectra with detected fragment ion  $[\text{THAC-NH}_3]^+$  at  $m/z$  1009; (d) ESCA result of collected products from the reaction of NaI and THAC-dioxygen complex. Additive shift of iodine  $3d_{5/2}$  and  $3d_{3/2}$  photoelectron lines stands for the suggested oxidation process.

MALDI-TOF mass spectra (Figs. S2, c) shows fragment ion at  $m/z$  1009, which is considered to present in the form of fragment ion  $[\text{THAC-NH}_3]^+$ . The active ESR signal (Fig. S2, b) acquired from powder form of resulted complex with calculated spectroscopic  $g$  factor of  $g_{\parallel}$  (2.28) and  $g_{\perp}$  (2.06) implicates an axial environment for the copper (II) ion, i.e.,  $g_{\parallel} > 2.1$  and  $g_{\perp} > 2.0$ .<sup>s1</sup> This can be expected for the ground state symmetry of copper (II)  $d^9$  ion is  $d_{x^2-y^2}$  and sustained the square-planar geometry of copper (II) ion with HDA molecules. Characteristic FTIR peaks (3260, 2956, 2919(s) 2851, 1596, 1468, 1352 and  $721 \text{ cm}^{-1}$ ) also inform the THAC complex formation (Fig. S2, a).<sup>s2</sup>

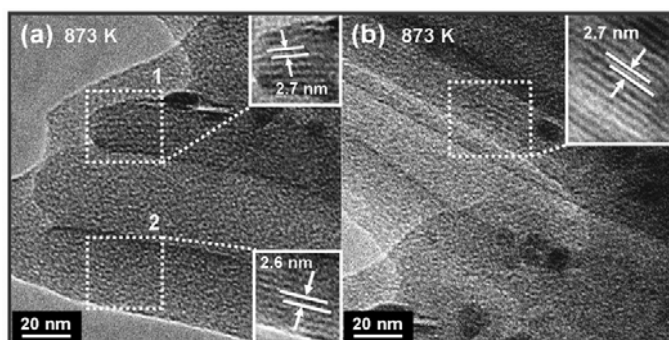

**Fig. S4** Multi-wall nanotube structure formed during *in-situ* TEM examination at 873 K. (a) TEM image of multi-layer structured nanotube. Two insets show the fast Fourier-transform (FFT) images of area 1 and 2, respectively. The insets reveal the layer spacing is close to 2.7 nm; (b) Additional TEM and FFT (inset) images taken at 873 K of a nanotube.

### References for supplementary information

- (S1) B. Lucchese, K. J. Humphreys, D.-H. Lee, C. D. Incarvito, R. D. Sommer, A. L. Rheingold, K. D. Karlin, *Inorg. Chem.*, 2004, **43**, 5987.
- (S2) S. Muñoz, G. W. Gokel, *Inorganica Chimica Acta.*, 1996, **250**, 59.
